# Supplementary material for: Resurgence of DSCs with copper electrolyte: a detailed investigation of interfacial charge dynamics with cobalt and iodine based electrolytes
Source: Royal Society of Chemistry journal article supplement (doi:10.1039/c8ta06948d), 2018-01-01
Supplement: c8ta06948d1.pdf [file c8ta06948d1.pdf]

# Resurgence of DSCs with copper electrolyte: A detailed investigation of the interfacial charge dynamics in comparison with cobalt and iodine

Sourava C. Pradhan,<sup>ac</sup> Anders Hagfeldt<sup>b</sup> and Suraj Soman<sup>\*ac</sup>

<sup>a</sup>Photosciences and Photonics Section, Chemical Sciences and Technology Division, CSIR-National Institute for Interdisciplinary Science and Technology (CSIR-NIIST), Thiruvananthapuram 695019, India. <sup>b</sup>Laboratory of Photomolecular Science, Institute of Chemical Sciences & Engineering, Ecole Polytechnique Federale de Lausanne, Lausanne 1015, Switzerland. <sup>c</sup>Academy of Scientific and Innovative Research (AcSIR), CSIR-NIIST Campus, Thiruvananthapuram 695019, India.

Table S1. *J-V* parameters at various light intensities.

|                       | Light Intensity | $V_{oc}$ (mV) | $J_{sc}$ (mAcm <sup>-2</sup> ) | FF   | Efficiency (%) |
|-----------------------|-----------------|---------------|--------------------------------|------|----------------|
| $I_3^-/I^-$           | 1 Sun           | 783           | 12.28                          | 0.60 | 5.79           |
|                       | 0.5 Sun         | 761           | 6.31                           | 0.66 | 6.32           |
|                       | 0.1 Sun         | 709           | 1.17                           | 0.73 | 6.07           |
| $[Co(bpy)_3]^{2+/3+}$ | 1 Sun           | 868           | 7.42                           | 0.70 | 4.52           |
|                       | 0.5 Sun         | 839           | 5.53                           | 0.58 | 5.36           |
|                       | 0.1 Sun         | 771           | 1.54                           | 0.52 | 6.23           |
| $[Cu(dmp)_2]^{1+/2+}$ | 1 Sun           | 902           | 12.66                          | 0.60 | 6.82           |
|                       | 0.5 Sun         | 888           | 7.34                           | 0.62 | 8.13           |
|                       | 0.1 Sun         | 795           | 1.49                           | 0.60 | 7.14           |

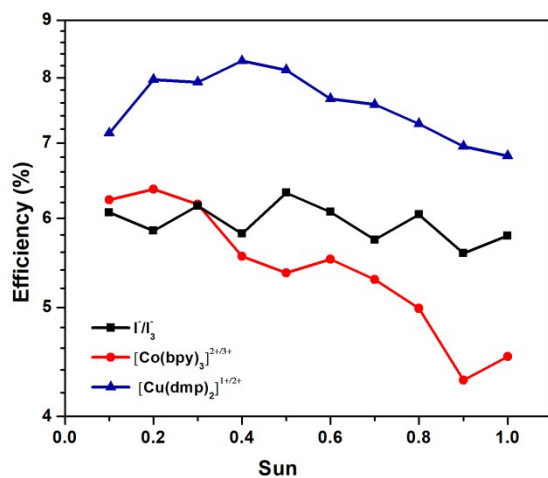

Figure S1. Efficiency at various light intensities employing  $I^-/I_3^-$ ,  $[Co(bpy)_3]^{2+/3+}$  and  $[Cu(dmp)_2]^{1+/2+}$  electrolytes.

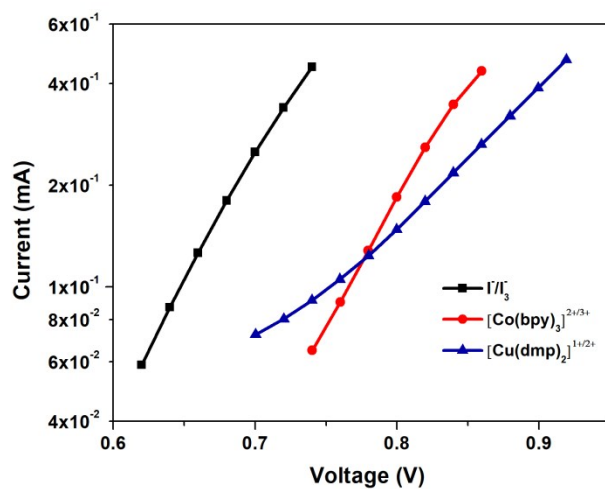

Figure S2. Dark current from EIS.

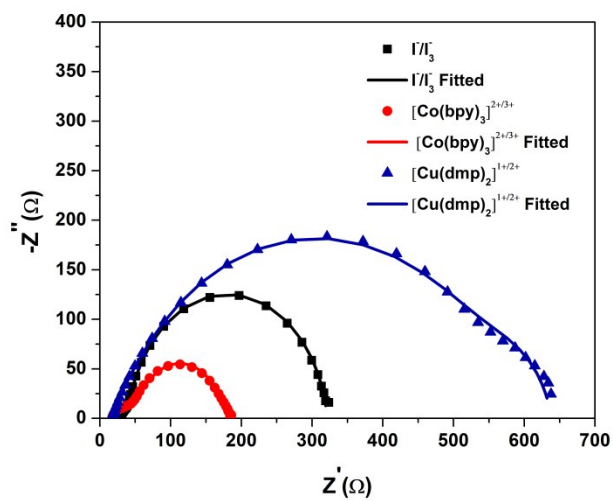

Figure S3. Nyquist plot of  $I^-/I_3^-$ ,  $[Co(bpy)_3]^{2+/3+}$  and  $[Cu(dmp)_2]^{1+/2+}$  electrolytes.

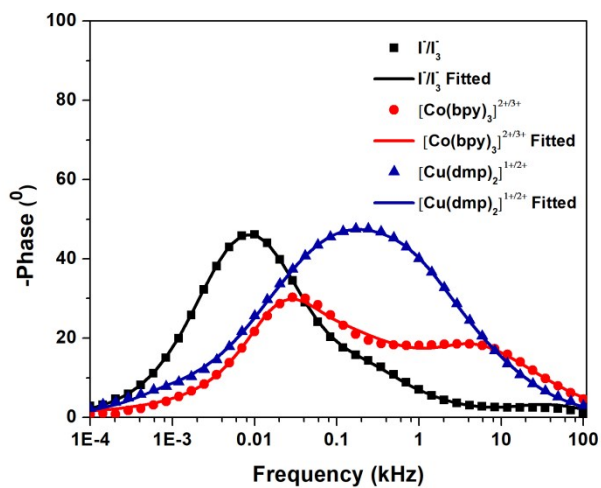

Figure S4. Bode plot of  $I^-/I_3^-$ ,  $[Co(bpy)_3]^{2+/3+}$  and  $[Cu(dmp)_2]^{1+/2+}$  electrolytes.

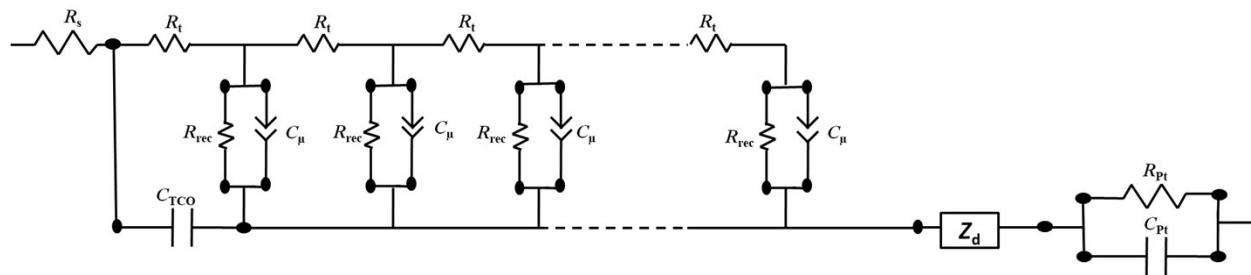

Figure S5. Equivalent circuit for EIS fitting.

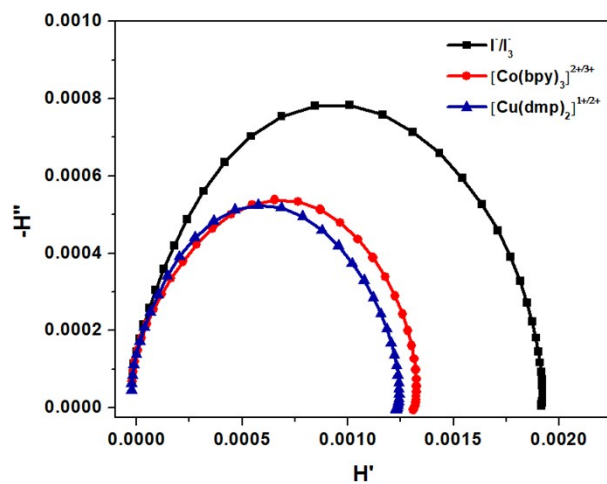

Figure S6. Nyquist plot for  $I^-/I_3^-$ ,  $[Co(bpy)_3]^{2+/3+}$  and  $[Cu(dmp)_2]^{1+/2+}$  electrolytes obtained from IMPS measurement.

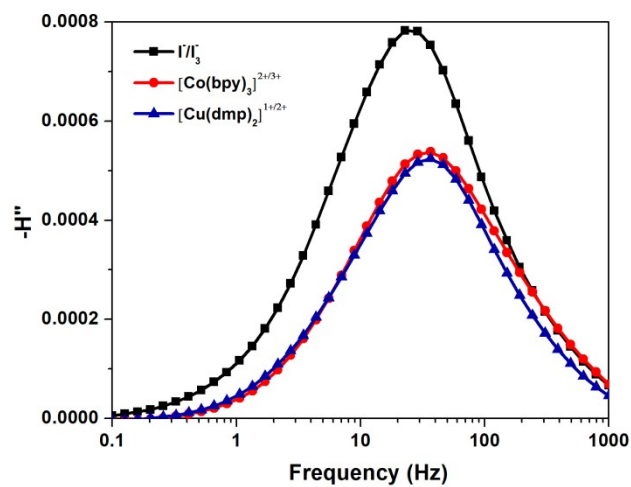

Figure S7. Bode plot of  $I^-/I_3^-$ ,  $[Co(bpy)_3]^{2+/3+}$  and  $[Cu(dmp)_2]^{1+/2+}$  electrolytes obtained from IMPS measurement.

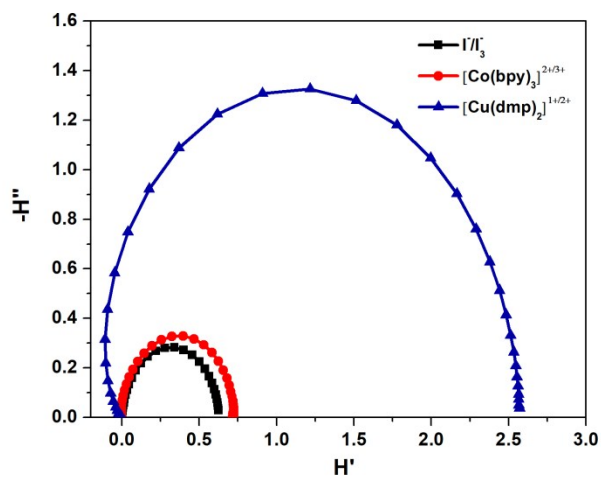

Figure S8. Nyquist plot of  $I^-/I_3^-$ ,  $[Co(bpy)_3]^{2+/3+}$  and  $[Cu(dmp)_2]^{1+/2+}$  electrolytes obtained from IMVS measurement.

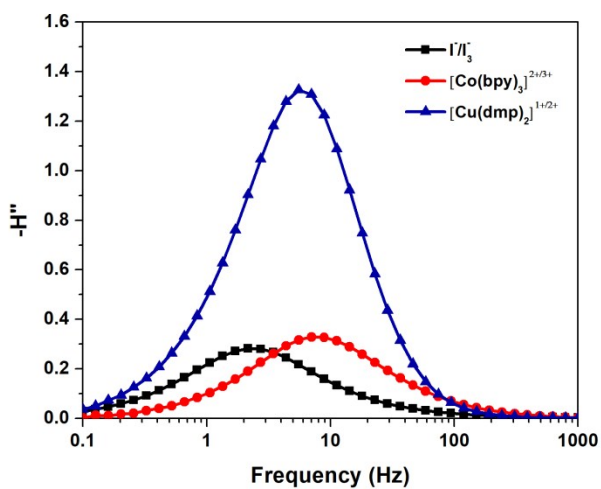

Figure S9. Bode plot of  $I^-/I_3^-$ ,  $[Co(bpy)_3]^{2+/3+}$  and  $[Cu(dmp)_2]^{1+/2+}$  electrolytes obtained from IMVS measurement.

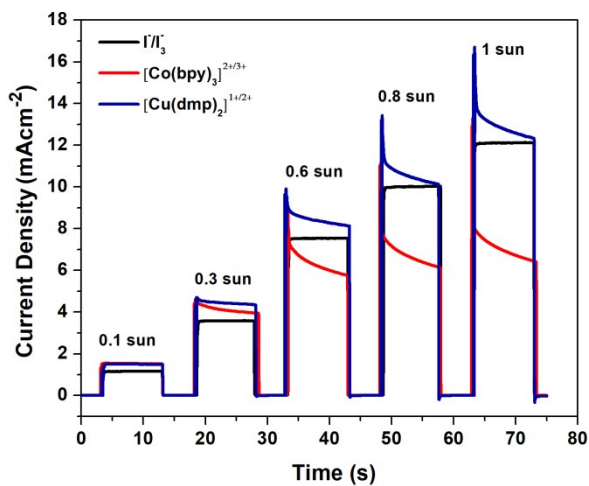

Figure S10. Current Transients of  $I^-/I_3^-$ ,  $[Co(bpy)_3]^{2+/3+}$  and  $[Cu(dmp)_2]^{1+/2+}$  electrolytes at various light intensities.
